# Supplementary material
Source: PubMed Central journal article supplement (PMC2258215)
Supplement: NIHMS40784-supplement-02.pdf [file NIHMS40784-supplement-02.pdf]

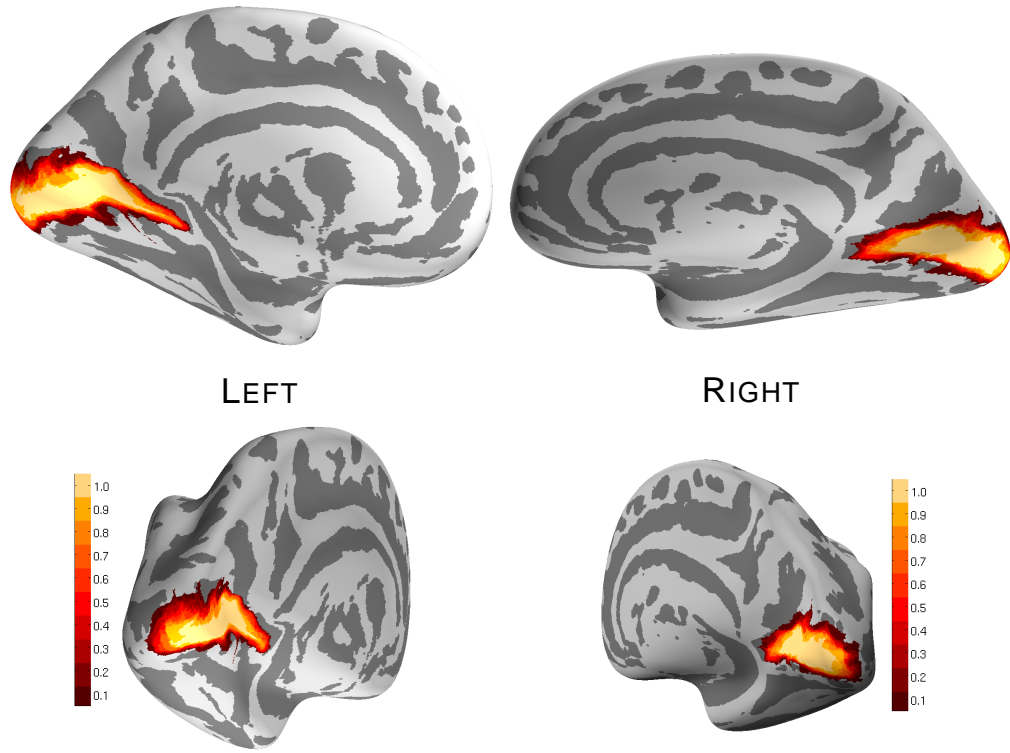

**Figure S3:** Probabilistic atlases of V1 generated using  $\lambda_d = 0.1$  and  $\lambda_A = 0.2$ . V1 probability is indicated by the color of the vertex, with yellow indicating high probability and red indicating low probability, as shown by the color bars.
