# Supplementary material
Source: PubMed Central journal article supplement (PMC2258215)
Supplement: NIHMS40784-supplement-03.pdf [file NIHMS40784-supplement-03.pdf]

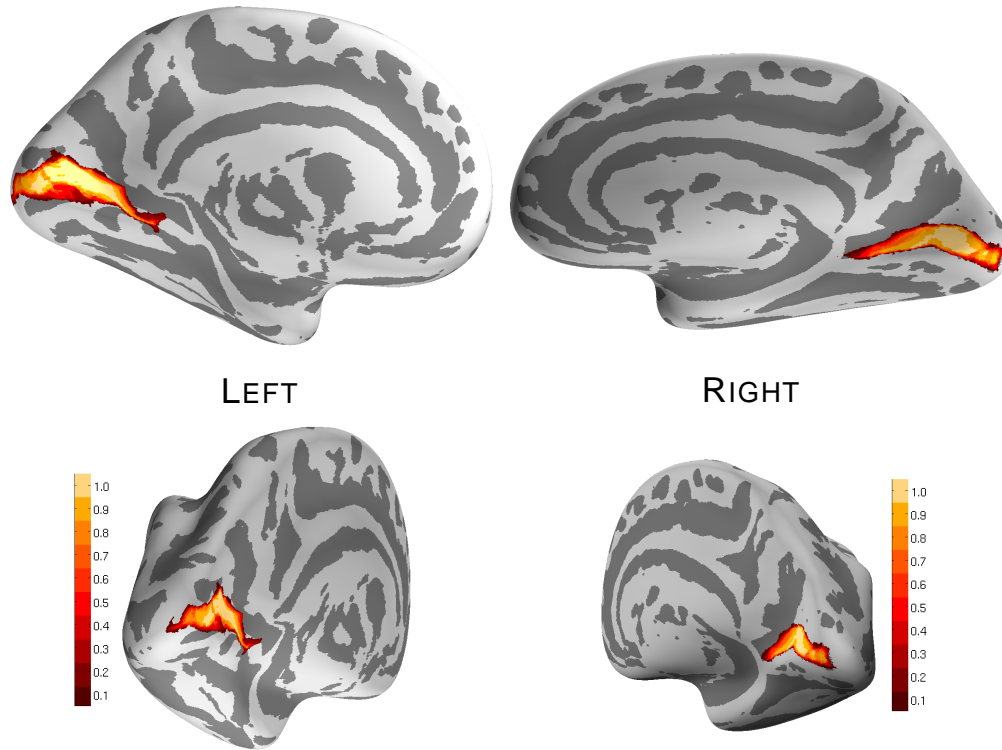

**Figure S4:** Probabilistic atlases of the calcarine sulcus generated in the same way as the main V1 atlas from semi-automatically identified calcarine regions for each individual hemisphere. Calcarine probability is indicated by the color of the vertex, with yellow indicating high probability and red indicating low probability, as shown by the color bars.
