# Supplementary material
Source: PubMed Central journal article supplement (PMC2258215)
Supplement: NIHMS40784-supplement-05.pdf [file NIHMS40784-supplement-05.pdf]

**Table S2:** For each hemisphere, similarity measures computed for the group of five individuals that were diagnosed with neurological disease, or for which disease state was unknown. The mean and standard deviation of the similarity measures computed over all possible groups of five individuals is also shown, as well as the rank and percentile of the all-diseased group in the sorted list of similarity measures computed over the 252 possible groups.

| LEFT               |              |                 |      |            |
|--------------------|--------------|-----------------|------|------------|
| similarity measure | all diseased | all groups      | rank | percentile |
| kernel size        | 4.7          | $4.7 \pm 0.26$  | 137  | 54         |
| % blurring         | 32.4         | $34.0 \pm 3.81$ | 89   | 35         |
| Jaccard coef.      | 0.58         | $0.53 \pm 0.04$ | 28   | 11         |
| % overlap          | 76.3         | $70.8 \pm 3.22$ | 11   | 4          |

  

| RIGHT              |              |                 |      |            |
|--------------------|--------------|-----------------|------|------------|
| similarity measure | all diseased | all groups      | rank | percentile |
| kernel size        | 5.7          | $5.4 \pm 0.17$  | 228  | 90         |
| % blurring         | 35.0         | $32.9 \pm 3.95$ | 170  | 67         |
| Jaccard coef.      | 0.46         | $0.51 \pm 0.05$ | 222  | 88         |
| % overlap          | 62.2         | $67.4 \pm 4.37$ | 236  | 94         |
