# Supplementary material
Source: PubMed Central journal article supplement (PMC2258215)
Supplement: NIHMS40784-supplement-06.pdf [file NIHMS40784-supplement-06.pdf]

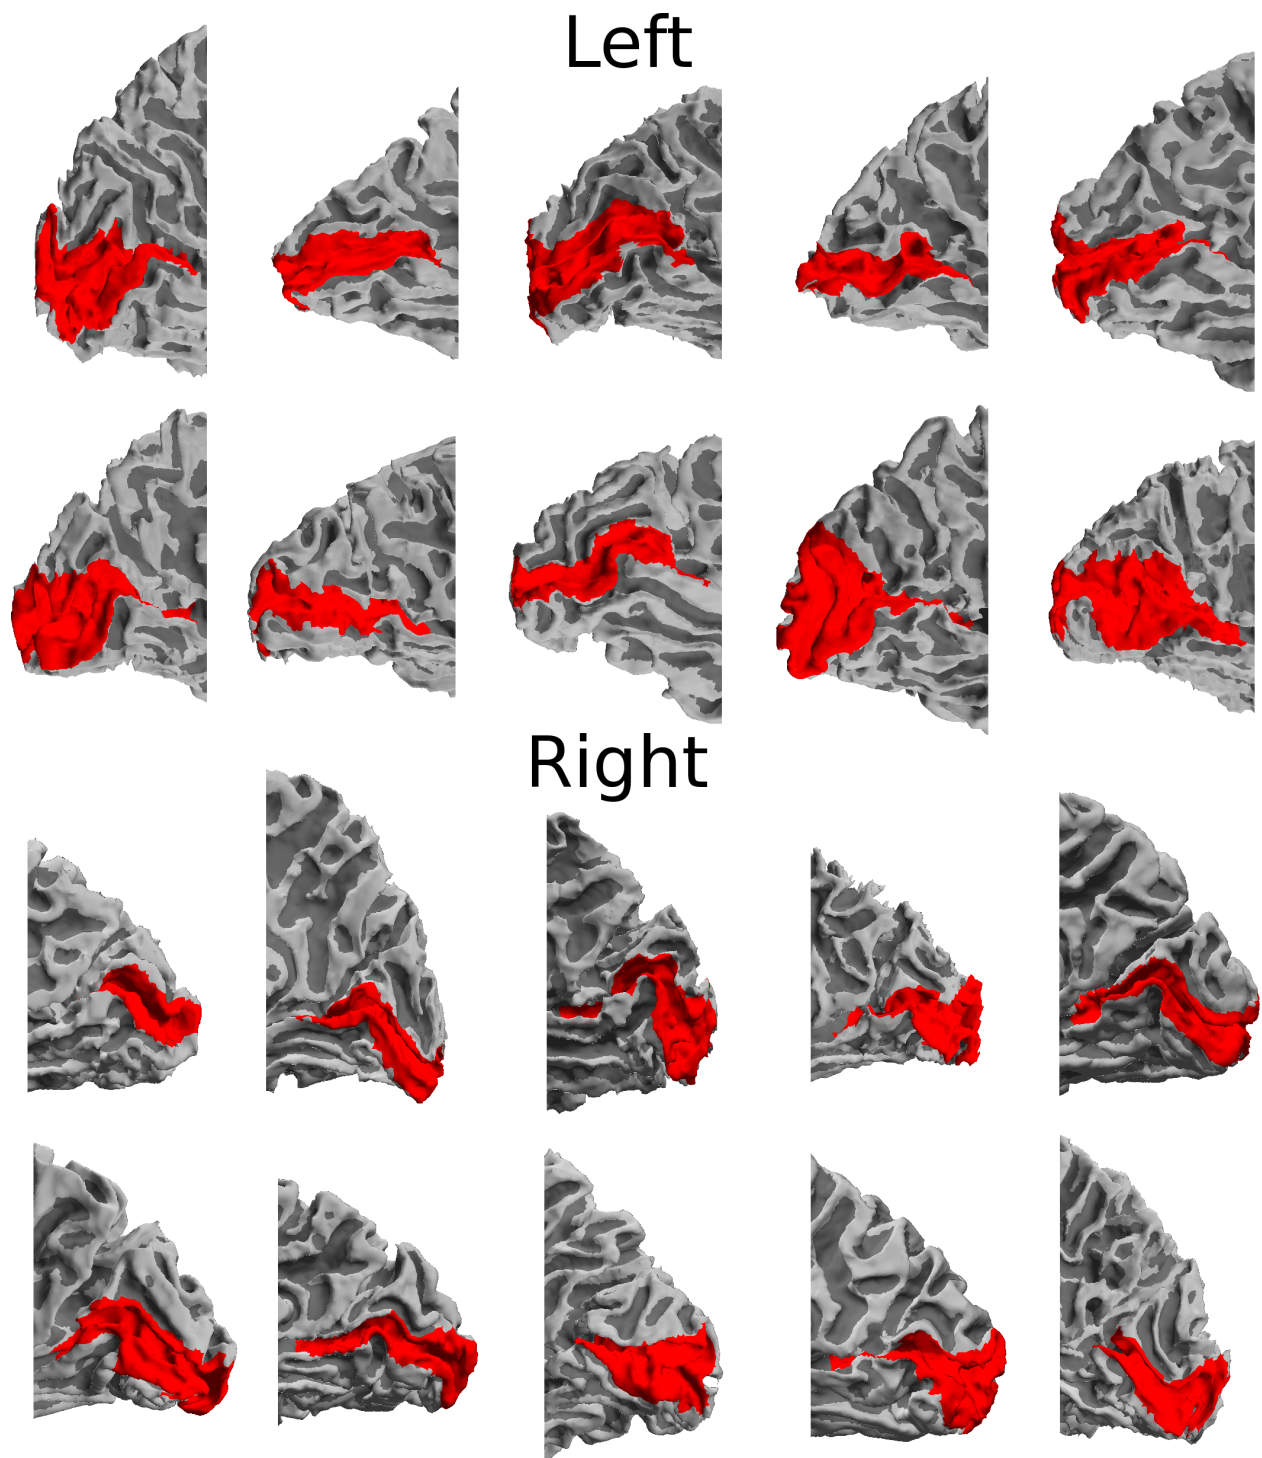

**Figure S1:** A medial view of the occipital cortex is shown for each *ex vivo* hemisphere. The location of V1 is indicated by the red region. All surfaces are drawn to scale.
