# Supplementary material
Source: PubMed Central journal article supplement (PMC2258215)
Supplement: NIHMS40784-supplement-07.pdf [file NIHMS40784-supplement-07.pdf]

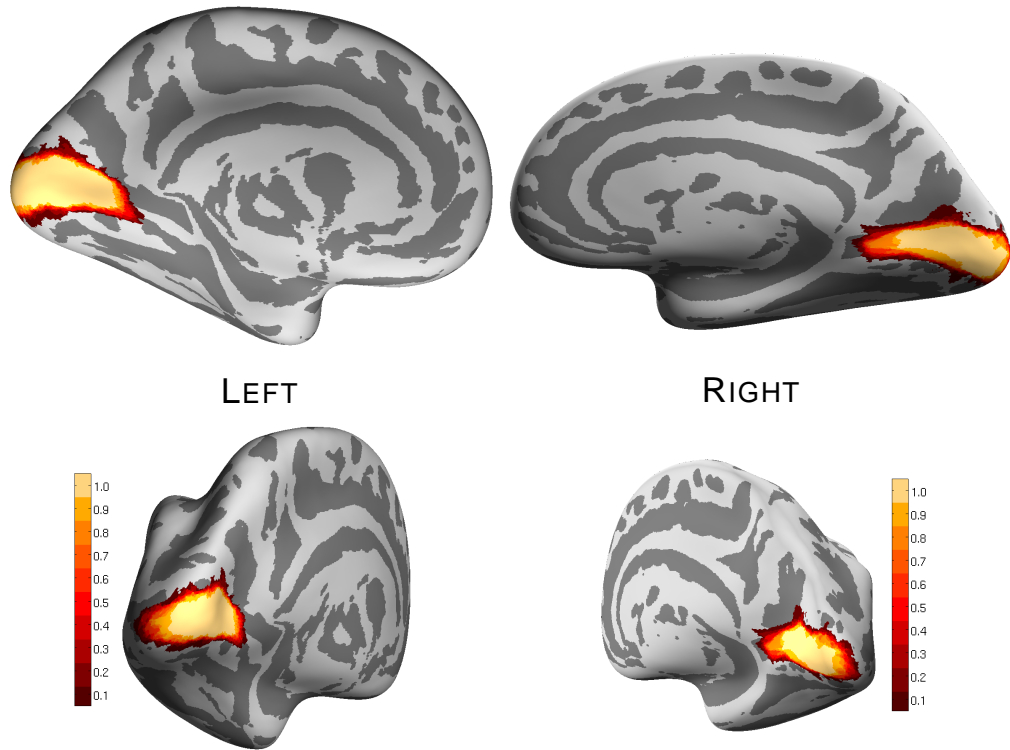

**Figure S2:** V1 atlases generated via surface registration of each hemisphere to a template created from *in vivo* subjects. V1 probability is indicated by the color of the vertex, with yellow indicating high probability and red indicating low probability, as shown by the color bars.
